# Supplementary material
Source: PubMed Central journal article supplement (PMC4115286)
Supplement: NIHMS546951-supplement-Supplementary_Material.pdf [file NIHMS546951-supplement-Supplementary_Material.pdf]

# A HepG2

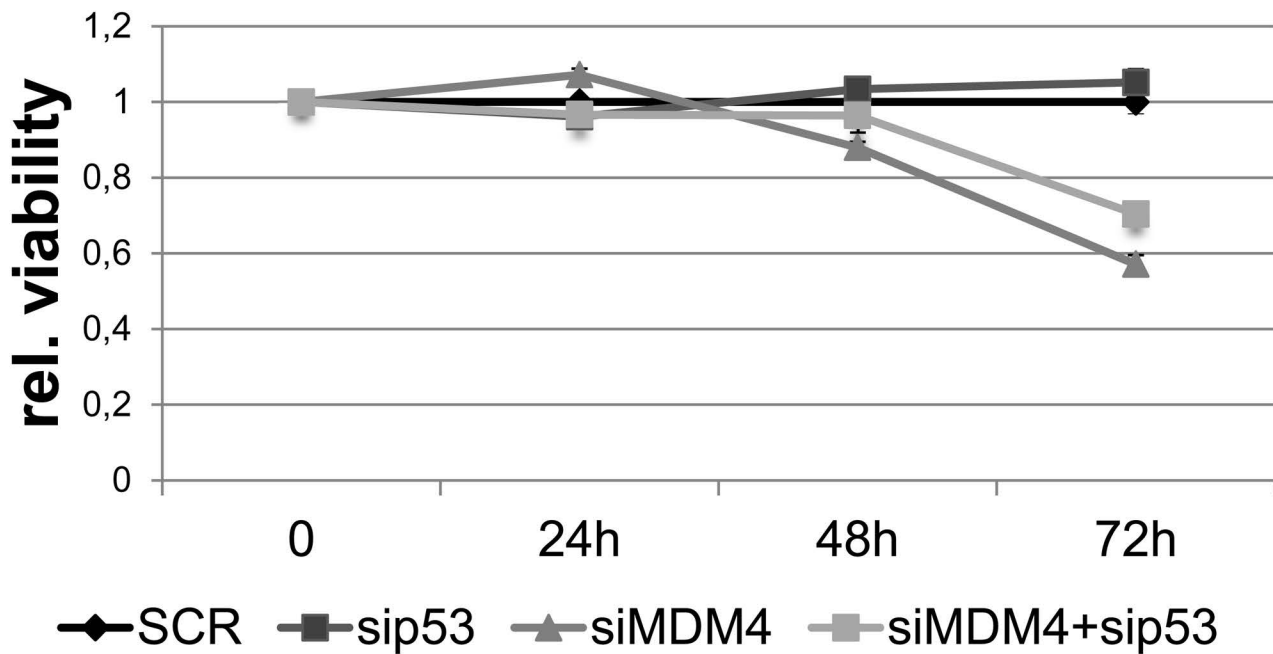

# B HuH7

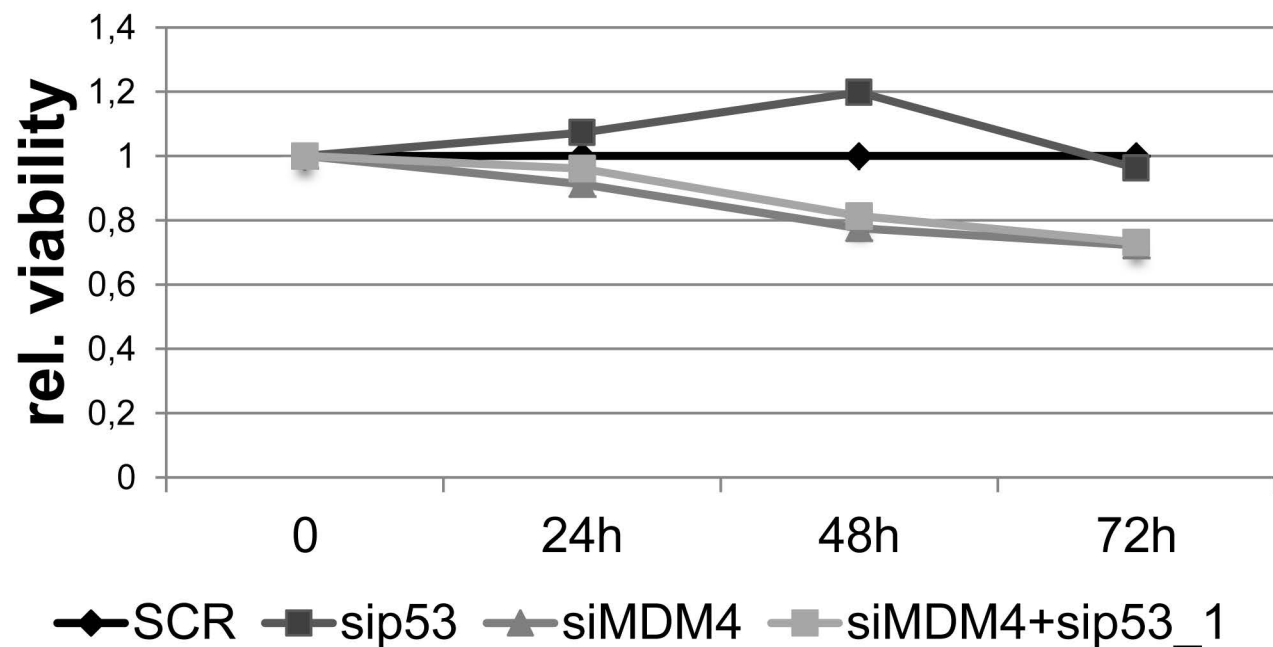

# A HepG2 (Rapamycin)

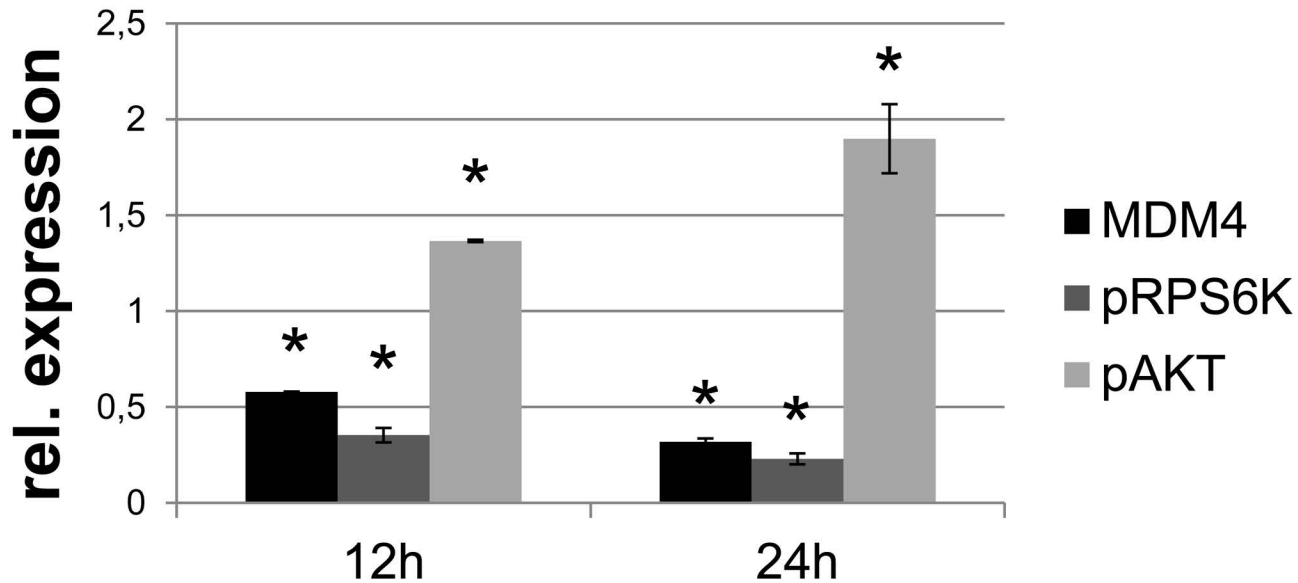

# B Hep3B (Rapamycin)

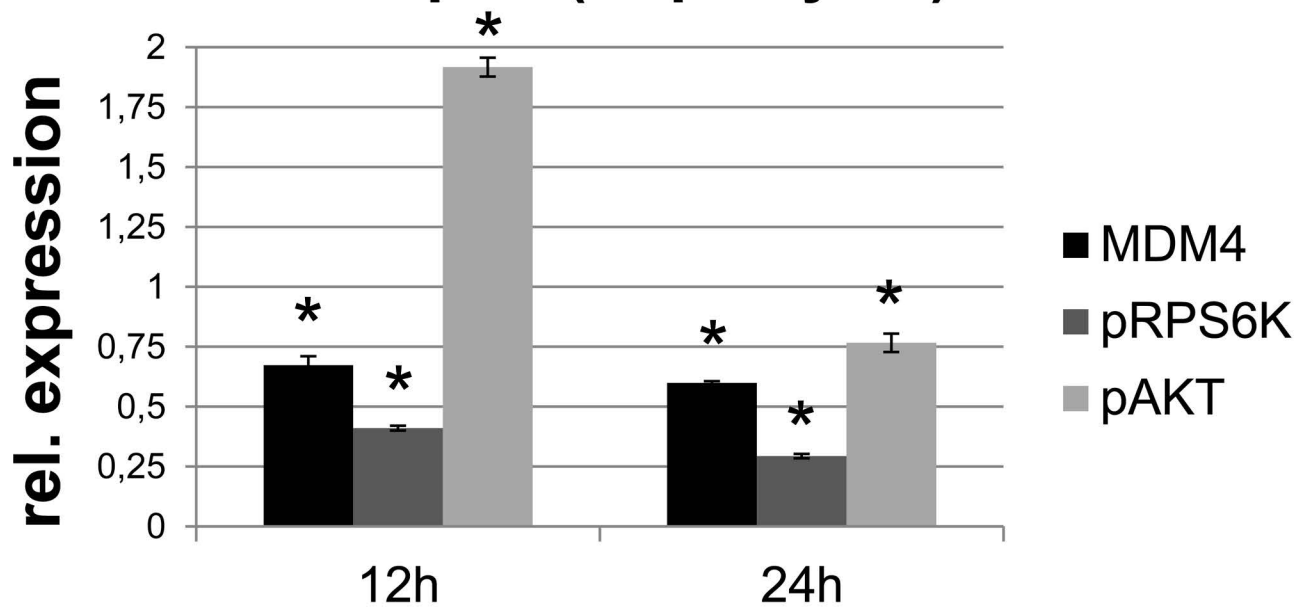

HuH7

Hep3B

MDM4 (55 kDa)

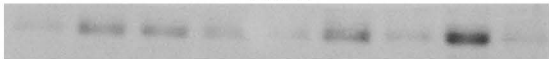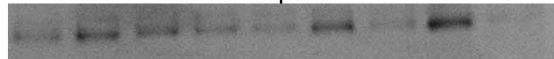

MDM2 (90 kDa)

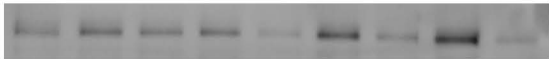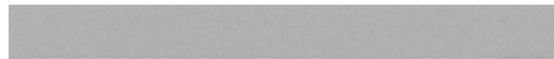

pAKT (60 kDa)

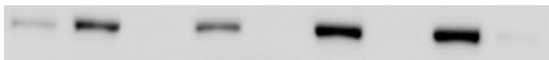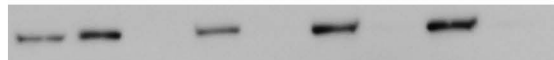

pRPS6K (70 kDa)

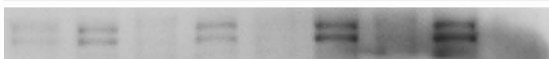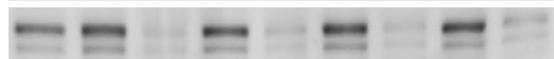

Actin (42 kDa)

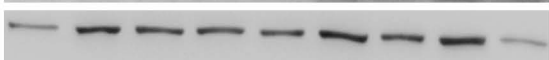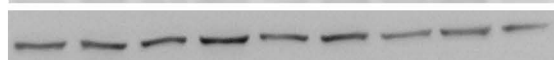C D PI D PI D PI D PI  
0 6h 12h 24h 48hC D PI D PI D PI D PI  
0 6h 12h 24h 48h

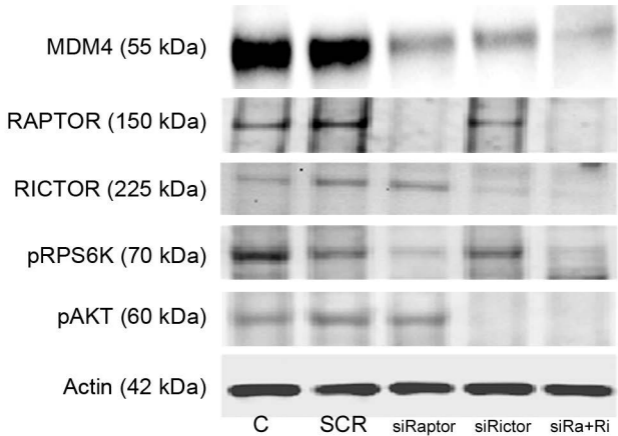

MDM4 (55 kDa)

MDM2 (90 kDa)

p53 (53 kDa)

pAKT (60 kDa)

AKT (60 kDa)

Actin (60 kDa)

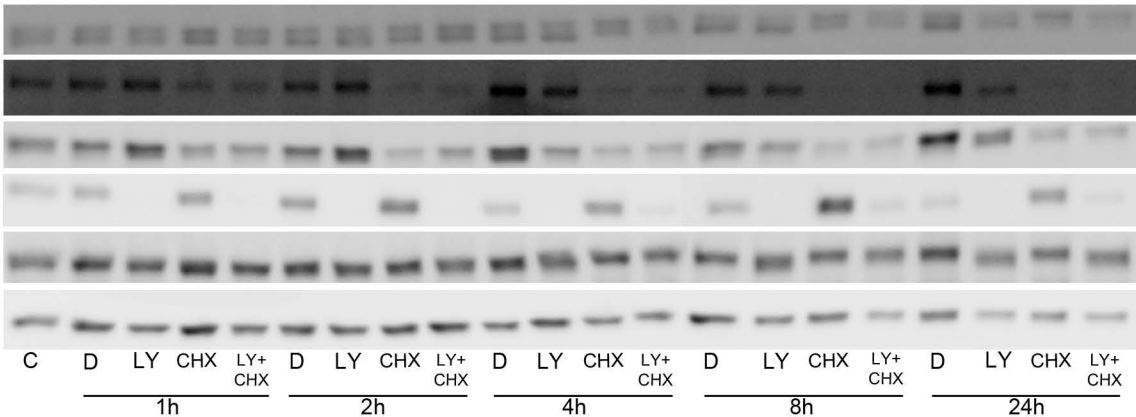

**A****HuH6**

GFP

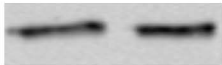

Actin

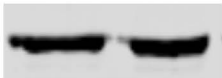

shNC

shMDM4

**B****HuH6 xenografts**

GFP

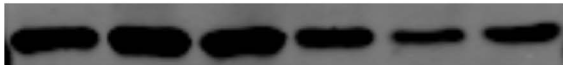

Actin

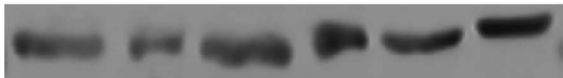

shNC

shMDM4

**A**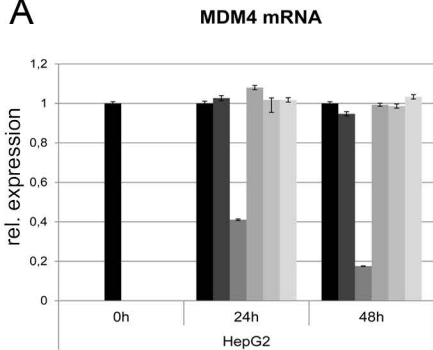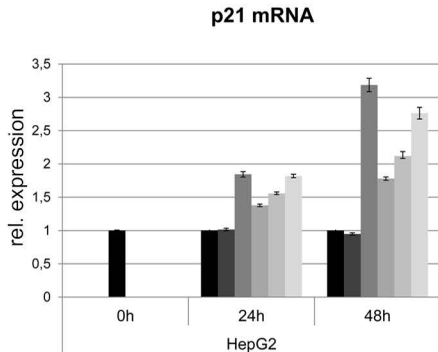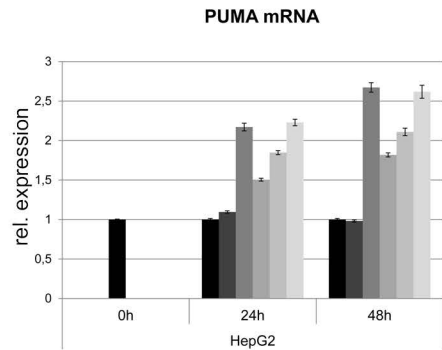**B**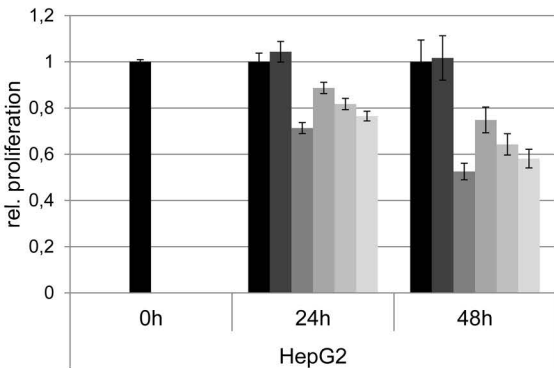**C**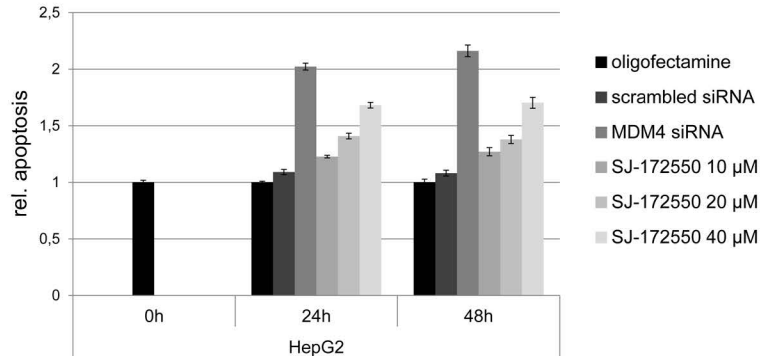

**A**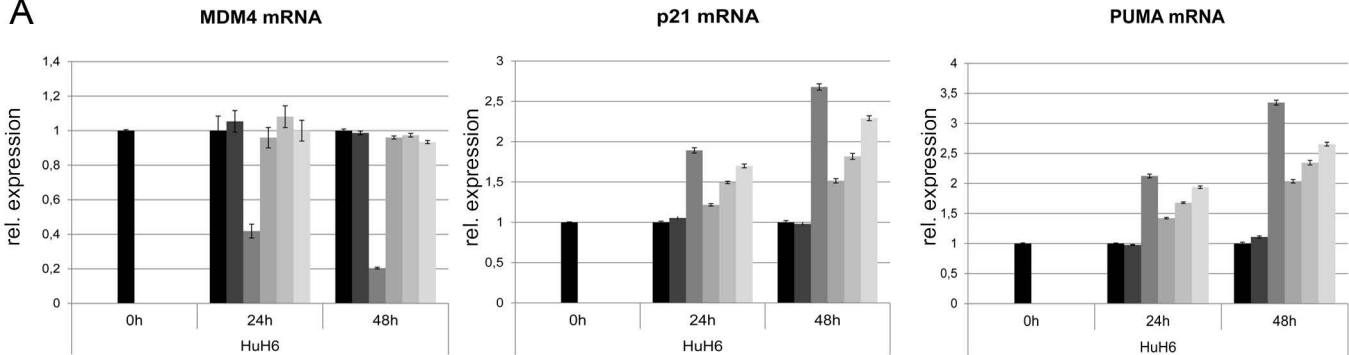**B**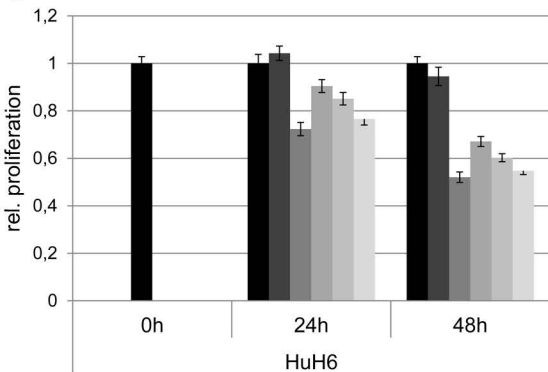**C**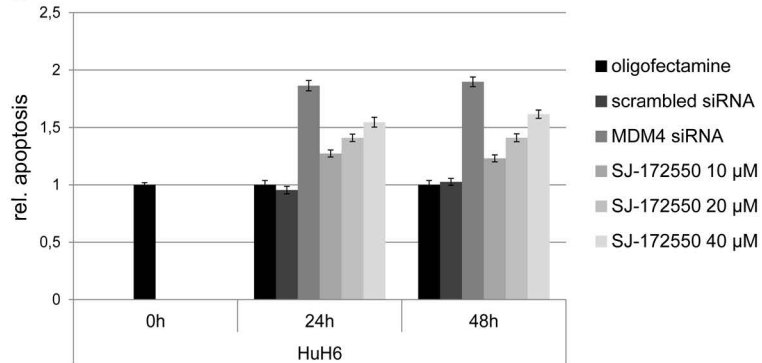



**A****MDM4 mRNA**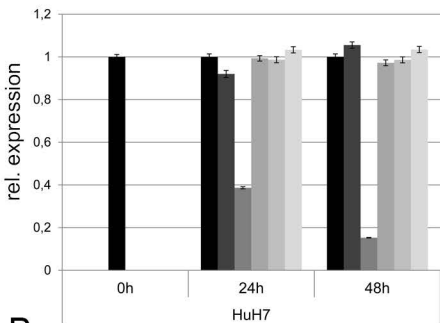**p21 mRNA**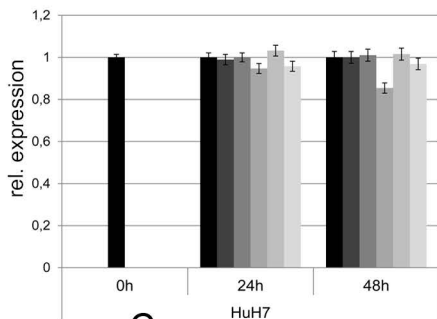**PUMA mRNA**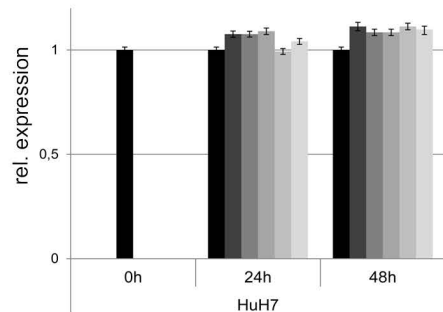**B**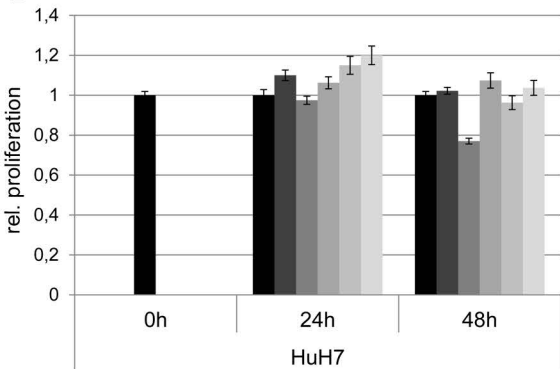**C**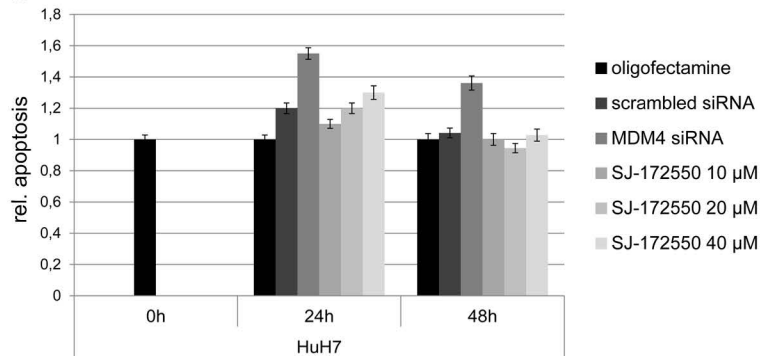

■ oligofectamine  
 ■ scrambled siRNA  
 ■ MDM4 siRNA  
 ■ SJ-172550 10 μM  
 ■ SJ-172550 20 μM  
 ■ SJ-172550 40 μM

**A**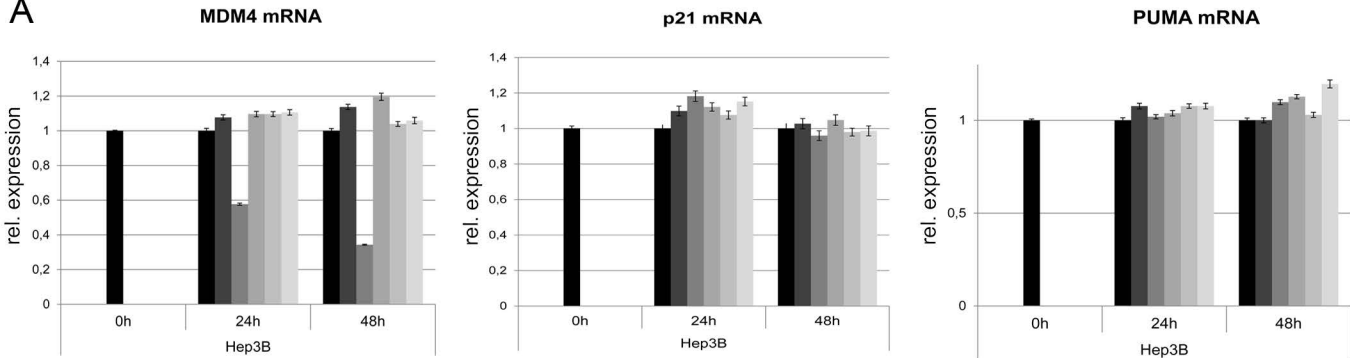**B**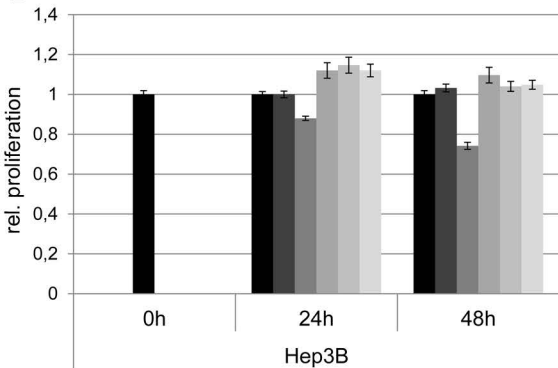**C**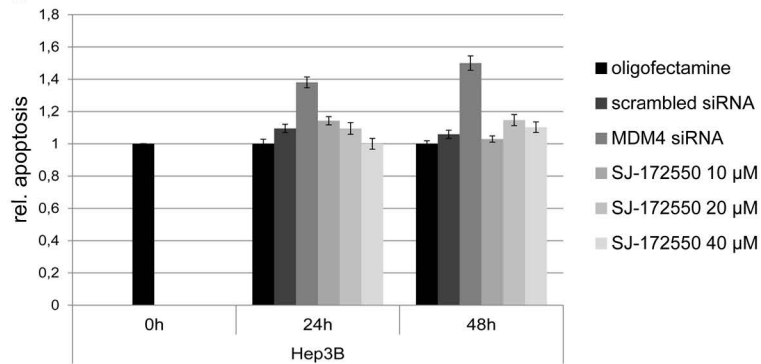

**A****MDM4 mRNA**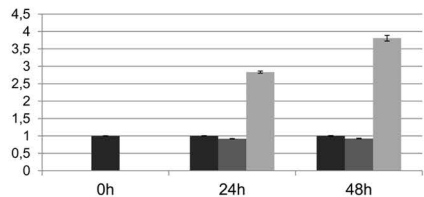**p21 mRNA**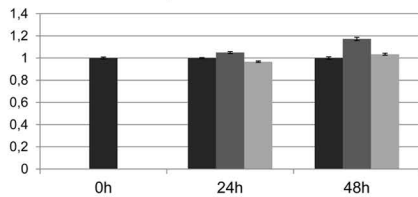**PUMA mRNA**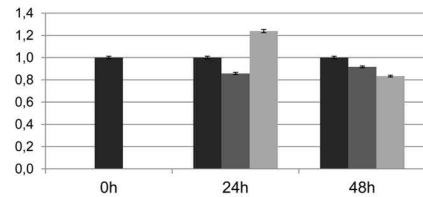**B**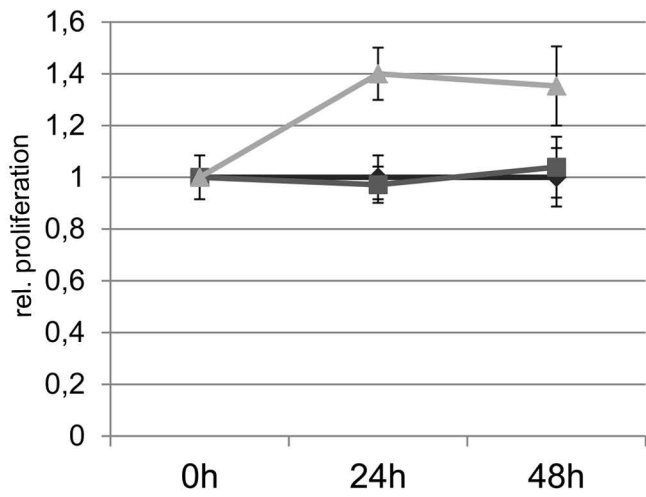**C**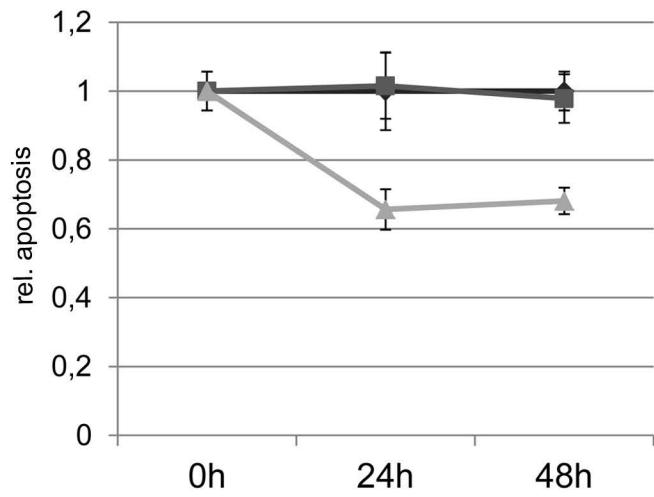

# SNU182

MDM4 (55 kDa)

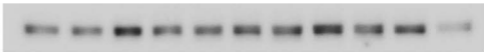

pAKT (60 kDa)

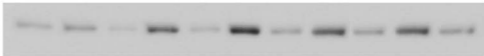

AKT (60 kDa)

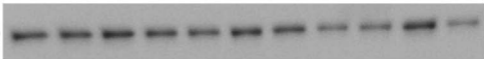

Actin (42 kDa)

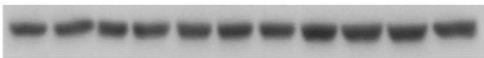

| C | <u>D</u> <u>LY</u> |  |
|---|--------------------|--|--------------------|--|--------------------|--|--------------------|--|--------------------|--|
| 0 | 1h                 |  | 2h                 |  | 4h                 |  | 8h                 |  | 24h                |  |

# HepG2 (siAKT)

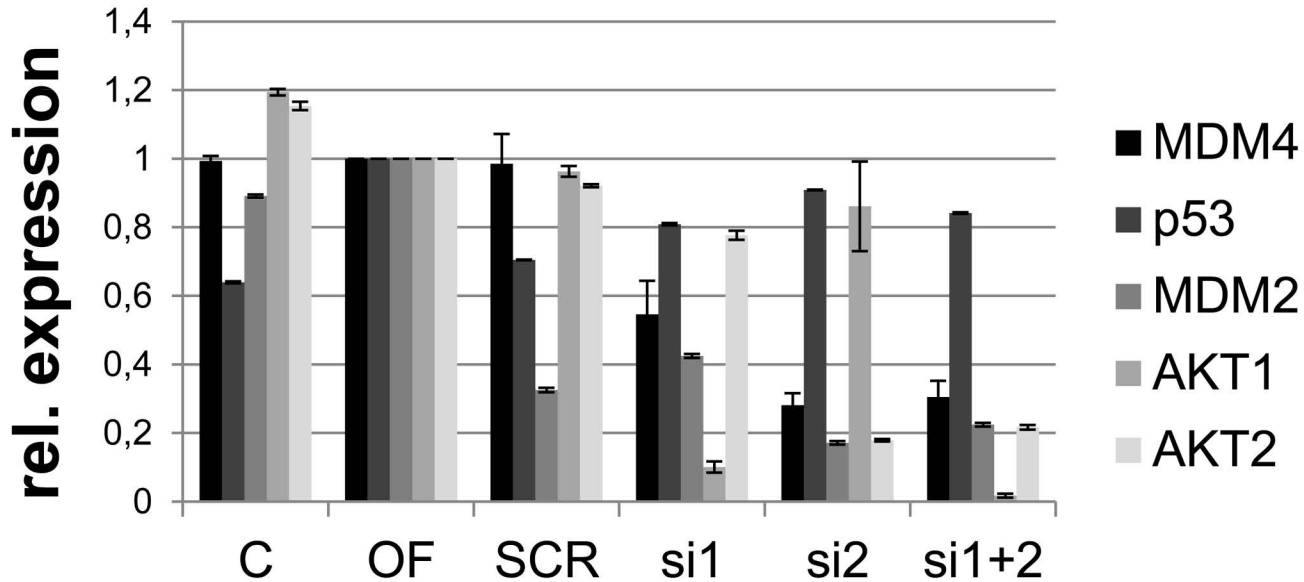

# Hep3B

MDM4 (55 kDa)

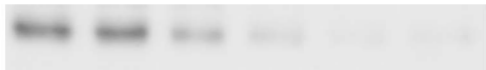

MDM2 (90 kDa)

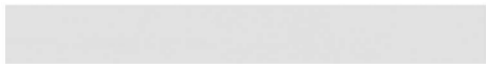

AKT1 (60 kDa)

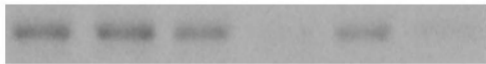

AKT2 (60 kDa)

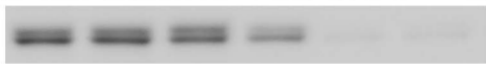

Actin (42 kDa)

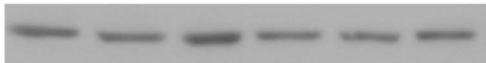

C

OF

SCR

si1

si2

si1+2

## Supplementary Materials

### Cell lines, transfection and treatments

HuH6, HepG2 cell lines (harboring wild-type p53), and HuH7, HLE, Hep3B, Focus, SNU182, and SNU423 cell lines (harboring mutated or deleted p53) were cultured either in DMEM or RPMI medium, supplemented with 10% fetal bovine serum (PAA, Pasching, Austria) and 1% penicillin–streptomycin (10 mg/ml, PAA) at 37°C (5% CO<sub>2</sub>) and passaged every 3-4 days. Transient transfection experiments of HLE cells with either *MDM4* or *EEF1A2* cDNA in pCMV6-XL5 vector (OriGene Technologies, Rockville, MD) was performed following the manufacturer's protocol using Lipofectamine 2000 (Invitrogen, Carlsbad, CA) for transfection procedures. For stable transfection of the *AKT1* gene (in a pCMV6-XL5 plasmid; Origene Technologies) in the HLE cell line, stable transfectants were selected with cloning cylinders after 3–4 weeks in medium containing Geneticin (600 µg/ml) and were obtained from a previous study(1). For the treatment with chemical inhibitors, HCC cells were plated at a density of  $1.5 \times 10^5$  cells/well in 6 cm plates and were incubated with the following drugs after 24 hours, as indicated: Rapamycin (mTORC1 inhibitor; 10 nmol/L; Enzo Life Sciences, Lörrach, Germany), LY29004 (PI3K inhibitor; 50 µmol/L; Enzo Life Sciences), PI-103 (PI3K, mTORC1 and mTORC2 inhibitor; 2 µmol/L; Enzo Life Sciences), SJ-172550 (blocker of the MDM-p53 interaction; 10-40 µM; Santa Cruz Biotechnology), AKT1/2 (AKT1/2 inhibitor; 10 µM; Sigma-Aldrich, St. Louis, MO), cycloheximide (protein synthesis inhibitor; Merck, Darmstadt, Germany), and/or MG132 (proteosomal inhibitor, 450 µmol/L; Enzo Life Sciences). All siRNA transfections were performed using oligofectamine (Invitrogen, Karlsruhe, Germany) according to the manufacturer's protocol. The sequences of the small interfering RNAs and the final concentrations used (siRNA, Eurofins MWG Operon, Ebersberg, Germany), are listed in Supplementary Table 2. siRNAs against Raptor and Rictor (Santa Cruz Biotechnology, Santa Cruz, CA) were used according to the manufacturer's recommendations. For functional assays HCC cell lines were seeded at a density of  $6 \times 10^3$  cells in 96 well plates and were transfected with siRNA or cDNA after 24 hours. Combined PI103 treatment was performed 48 hours after transfection of a p53-specific siRNA. Cell viability (MTT-assay) and apoptosis were determined using the Cell Proliferation Kit and Cell Death Detection Elisa Plus Kit (Roche Molecular Biochemicals, Mannheim, Germany), as described previously (2, 3). For all cell based assays, results were confirmed in three independent experiments.

### *Murine xenograft model*

For analysis of tumorigenicity, Hep3B, HuH6, HepG2 and HuH7 cells were stably transfected with a specific GFP-tagged miR-30–based shRNAs targeting MDM4 (shMDM4) and Renilla luciferase (shNC), as control (see Supplementary Table 2 for sequences), cloned in a LMP vector, as previously described (4). Briefly,  $5 \times 10^6$  cells (Hep3B, HuH6, HuH7) were subcutaneously injected into both

flanks of 5- to 6-week-old non-obese diabetic/severe combined immunodeficient (NOD/SCID) mice as described previously (5). Tumor volumes were monitored over a period of 6-8 weeks using calipers. Tumors were isolated and analyzed by histology and Western blot analysis.

### **Western Blot Analysis and Immunoprecipitation**

Tissue and cell samples were homogenized in lysis buffer [30 mM Tris (pH 7.5), 150 mM NaCl, 1% NP-40, 0.5% Na deoxycholate, 0.1% SDS, 10% glycerol, and 2 mM EDTA] containing the Complete Protease Inhibitor Cocktail (Roche Molecular Biochemicals) and sonicated. Protein concentrations were determined with the Bio-Rad Protein Assay Kit (Bio-Rad, Hercules, CA) using bovine serum albumin as standard. For Western blotting, aliquots of 100 µg were denatured by boiling in Tris-Glycine SDS Sample Buffer (Invitrogen), separated by SDS-PAGE, and blotted onto nitrocellulose membranes (Invitrogen). Membranes were blocked in 5% non-fat dry milk in Tris-buffered saline containing 0.1% Tween 20 for 1 h and probed with specific antibodies listed in Supplementary Table 1. Each incubation with a primary antibody was followed by incubation with a horseradish peroxidase-conjugated secondary antibody for 1 h (1:5000; Cell Signaling) and visualized using the Super Signal West Pico (Pierce Chemical, New York, NY). Protein densities were calculated by ImageQuANT 5.1 software (GE Healthcare, Piscataway, NJ) and normalized to β-actin to determine the relative expression levels. For immunoprecipitation (IP), 600 µg of HCC cell protein lysate were immunoprecipitated with 6 µg of MDM4 mouse monoclonal antibody. After immunoblotting, the membranes were incubated with a goat polyclonal anti-USP2a antibody (Santa Cruz Biotechnology) or anti-AKT1 antibody (Santa Cruz Biotechnology). As negative control for IP, primary antibodies were neutralized, prior to IP, by a preincubation of 2 h at room temperature with the respective immunogen peptide (1:20 w/w), which resulted in the inhibition of the IP. Dephosphorylation of the protein lysate prior to IP was employed using the λ protein phosphatase (Cell Signaling Technology), following the manufacturer's protocol.

### **Tissue microarrays and immunohistochemistry**

A tissue microarray (TMA) containing tissue from normal livers (n=20), non-tumorous liver tissue of HCC patients (n=66), and HCCs (n=76; Supplementary Table 3) was constructed as previously described (6), and immunohistochemistry was performed on 5 mm sections. Primary antibodies used for incubation are listed in Supplementary Table 1. Antigens were retrieved using citrate buffer (pH 6.1; Dako, Glostrup, Denmark). For detection, the EnVision method (Dako) was used. Counterstaining was performed using hemalum. Staining was assessed using the immunoreactive score as described previously (2): 0, absent; 1-4, weak; 5-8, moderate; 9-12, strong expression.



## Statistical Analysis

The correlation between gene expression and clinico-pathological parameters was tested by Wilcoxon-signed-rank tests and measured by Spearman's rank correlations.  $P < .05$  was considered statistically significant. Survival was defined as the time interval between diagnosis and death. Cut-off values for the investigated biomarkers were defined based on the median expression levels in the investigated sample (about 24 patients with a decreased, and about 24 patients with an increased expression). Univariate survival analysis was based on the Kaplan-Meier method and multivariate survival analyses relied on a Cox regression model. Statistical analyses were conducted using SPSS 20.0 (SPSS, Chicago, IL, USA), SAS version 9.2 and Kaplan-Meier curves were plotted using R version 2.11.1 (The R Project for Statistical Computing, <http://www.r-project.org/>).

## References

1. Calvisi DF, Wang C, Ho C, Ladu S, Lee SA, Mattu S, Destefanis G, et al. Increased lipogenesis, induced by AKT-mTORC1-RPS6 signaling, promotes development of human hepatocellular carcinoma. *Gastroenterology* 2011;140:1071-1083.
2. Schlaeger C, Longerich T, Schiller C, Bewerunge P, Mehrabi A, Toedt G, Kleeff J, et al. Etiology-dependent molecular mechanisms in human hepatocarcinogenesis. *Hepatology* 2008;47:511-520.
3. Neumann O, Kesselmeier M, Geffers R, Pellegrino R, Radlwimmer B, Hoffmann K, Ehemann V, et al. Methylome analysis and integrative profiling of human HCCs identify novel protumorigenic factors. *Hepatology* 2012.
4. Dickins RA, Hemann MT, Zilfou JT, Simpson DR, Ibarra I, Hannon GJ, Lowe SW. Probing tumor phenotypes using stable and regulated synthetic microRNA precursors. *Nat Genet* 2005;37:1289-1295.
5. Rabenhorst U, Beinoraviciute-Kellner R, Brezniceanu ML, Joos S, Devens F, Lichter P, Rieker RJ, et al. Overexpression of the far upstream element binding protein 1 in hepatocellular carcinoma is required for tumor growth. *Hepatology* 2009;50:1121-1129.
6. Longerich T, Breuhahn K, Odenthal M, Petmecky K, Schirmacher P. Factors of transforming growth factor beta signalling are co-regulated in human hepatocellular carcinoma. *Virchows Arch* 2004;445:589-596.

**Supplementary Table 1.** List of the primary antibodies used.

| <b>Protein</b>            | <b>Antibody</b>   | <b>Epitope mapping</b>                  | <b>Company</b>                            |
|---------------------------|-------------------|-----------------------------------------|-------------------------------------------|
| AKT                       | Rabbit polyclonal | COOH terminus                           | Cell Signaling Technology (Danvers, MA)   |
| AKT1                      | Goat polyclonal   | COOH terminus                           | Santa Cruz Biotechnology (Santa Cruz, CA) |
| cleaved Caspase3          | Rabbit polyclonal | Human Active Caspase-3 Fragment         | BD Biosciences (Franklin Lakes, NJ)       |
| EEF1A2                    | Rabbit polyclonal | NH <sub>2</sub> terminus                | Epitomics (Burlingame, CA)                |
| HA-Tag                    | Mouse monoclonal  | HA-Tag                                  | Cell Signaling Technology (Danvers, MA)   |
| MDM2                      | Mouse monoclonal  | region between residues 154-167         | Santa Cruz Biotechnology (Santa Cruz, CA) |
| MDM4 (WB/IHC)             | Rabbit polyclonal | region between residues 125 and 175     | Bethyl Laboratories, (Montgomery, TX)     |
| P21 <sup>WAF1</sup> (WB)  | Mouse monoclonal  | Full length                             | Santa Cruz Biotechnology (Santa Cruz, CA) |
| P21 <sup>WAF1</sup> (IHC) | Mouse monoclonal  | region between residues 145-164         | BD Biosciences (Franklin Lakes, NJ)       |
| P53 (WB)                  | Mouse monoclonal  | Full length                             | BD Biosciences (Franklin Lakes, NJ)       |
| P53 (IHC)                 | Mouse monoclonal  | NH <sub>2</sub> terminus                | Dako (Glostrup, Denmark)                  |
| pAKT                      | Rabbit monoclonal | Serine 473 <sup>a</sup>                 | Cell Signaling Technology (Danvers, MA)   |
| pRPS6                     | Rabbit monoclonal | Residues surrounding Serine 235 and 236 | Cell Signaling Technology (Danvers, MA)   |
| pp70S6K                   | Rabbit monoclonal | serine 371                              | Cell Signaling Technology (Danvers, MA)   |
| PARP                      | Rabbit polyclonal | Full length                             | Cell Signaling Technology (Danvers, MA)   |
| PI3K (p110a)              | Rabbit polyclonal | region between residues 189-390         | Santa Cruz Biotechnology (Santa Cruz, CA) |
| PI4Kb                     | Mouse monoclonal  | NH <sub>2</sub> terminus                | Santa Cruz Biotechnology (Santa Cruz, CA) |
| Raptor                    | Mouse monoclonal  | Full length                             | Santa Cruz Biotechnology (Santa Cruz, CA) |
| Rictor                    | Rabbit polyclonal | NH <sub>2</sub> terminus                | Santa Cruz Biotechnology (Santa Cruz, CA) |
| USP2a                     | Rabbit polyclonal | COOH terminus                           | Abgent (San Diego, CA)                    |
| β-ACTIN                   | Rabbit polyclonal | COOH terminus                           | Santa Cruz Biotechnology (Santa Cruz, CA) |

Supplementary Table 2. Primer, shRNA and siRNA sequences

|                                                                                       |                                                                                                                                   |
|---------------------------------------------------------------------------------------|-----------------------------------------------------------------------------------------------------------------------------------|
| BAX-fw                                                                                | 5'-TGGAGCTGCAGAGGATGATTG-3'                                                                                                       |
| BAX-rev                                                                               | 5'-AAACATGTCAGCTGCCACTCG-3'                                                                                                       |
| Human MDM2-fw                                                                         | 5'-TCT GTG AGT GAG AAC AGG TGT CAC-3'                                                                                             |
| Human MDM2-rev                                                                        | 5'-ACA CAC AGA GCC AGG CTT TC-3'                                                                                                  |
| Human MDM4-fw                                                                         | 5'-CAG CAG GTG CGC AAG GTG AA-3'                                                                                                  |
| Human MDM4-rev                                                                        | 5'-CTG TGC GAG AGC GAG AGT CTG-3'                                                                                                 |
| P21-fw                                                                                | 5'-CACCGAGACACCACTGGAGG-3'                                                                                                        |
| P21-rev                                                                               | 5'-GAGAAGATCAGCCGGCGTTT-3'                                                                                                        |
| Puma-fw                                                                               | 5'-CCTGGAGGGTCCTGTACAATCT-3'                                                                                                      |
| Puma-rev                                                                              | 5'-GCACCTAATTGGGTCCATCT-3'                                                                                                        |
| 18s-fw                                                                                | 5'-AAACGGCTACCACATCCAAG-3'                                                                                                        |
| 18s-rev                                                                               | 5'-CCTCCAATGGATCCTCGTTA-3'                                                                                                        |
| EEF1A2-fw                                                                             | 5'-AGGACCATTGAGAAGTTCG-3'                                                                                                         |
| EEF1A2-rev                                                                            | 5'-AGATGTGCGATGGTGATGC-3'                                                                                                         |
| siAKT1 (40 nM)                                                                        | 5'-CAG GCU UGG UCC CGA GGC CAA-dTdT3'                                                                                             |
| siAKT2 (40 nM)                                                                        | 5'-AAC AAC UUC UCC GUA GCA GAA-dTdT3'                                                                                             |
| siEEF1A2 (40 nM)                                                                      | 5'-UCA AGA AGA UCG GCU ACA A-dTdT3'                                                                                               |
| siMDM4 (40 nM)                                                                        | 5'-AGC AAC UAU ACA CCU AGA A-dTdT3'                                                                                               |
| siP53 (5 nM)                                                                          | 5'-UGU UCC GAG AGC UGA AUG A-dTdT3'                                                                                               |
| siUSP2a (40 nM)                                                                       | 5'-CUC GUC CAU ACU CCA AGA A-dTdT3'                                                                                               |
| scrambled siRNA (SCR; 40 nM)                                                          | 5'-UUC UCC GAA CGU GUC ACG U-dTdT3'                                                                                               |
| shMDM4 (MDM4.3084)                                                                    | 5'-UGCUGUUGACAGUGAGCGACCCUAGAAUUGUCAAAACUJAAUAG<br>UGAAGCCACAGAUGUAUUAAGUUUGACAAUUCUAGGGCUGCCUAC<br>UGCCUCGGA-3'                  |
| shNC (neutral control shRNA,<br>Ren.713; effectively targeting<br>Renilla Luciferase) | 5'-CUCGAGAAGGUUAUUGCUGUUGACAGUGAGCGCAGGAAUUAU<br>AAUGCUUAUCUAUAGUGAAGCCACAGAUGUAUAGAUJAAAGCAUUAU<br>AAUUCUAUGCCUACUGCCUCGGAUUC-3' |

**Supplementary Table 3: Patient's characteristics of TMA cohort**

|                               |            |
|-------------------------------|------------|
| <b>Gender</b>                 |            |
| male                          | 59 (78%)   |
| female                        | 17 (22%)   |
| <b>Median age (range)</b>     | 58 (17-78) |
| <b>Etiology</b>               |            |
| HBV                           | 16 (21.1%) |
| HCV                           | 25 (32.9%) |
| co-infection                  | 4 (5.3%)   |
| alcohol                       | 13 (17.1%) |
| cryptogenic                   | 19 (25.0%) |
| genetic hemochromatosis       | 3 (3.9%)   |
| <b>Grading</b>                |            |
| well differentiated HCC       | 13 (17.1%) |
| moderately differentiated HCC | 55 (72.4%) |
| poorly differentiated HCC     | 8 (10.5%)  |
| <b>Tumor size</b>             |            |
| < 2.0 cm                      | 7 (9.2%)   |
| 2.0 – 5.0 cm                  | 39 (51.3%) |
| > 5.0 cm                      | 30 (39.5%) |
| <b>UICC stage</b>             |            |
| I                             | 35 (46.1%) |
| II                            | 24 (31.6%) |
| III                           | 13 (17.1%) |
| IV                            | 4 (5.3%)   |
| <b>Vascular invasion</b>      |            |
| present                       | 27 (35.5%) |
| none                          | 49 (64.5%) |
| <b>Liver cirrhosis</b>        |            |
| present                       | 46 (60.5%) |
